# Supplementary material
Source: PubMed Central journal article supplement (PMC1316263)
Supplement: bj3920283add.pdf [file bj3920283add.pdf]

## Supplementary data

Supplementary Table1. Binding partners of SNAP-25 determined by liquid chromatography tandem mass spectrometry (LC-MS/MS).

| Protein                             | Identified peptides by LCMS/MS and their modifications |
|-------------------------------------|--------------------------------------------------------|
| Syntaxin1                           | QLEITR                                                 |
|                                     | IAENVEEVK                                              |
|                                     | QALSEIETR                                              |
|                                     | IAENVEEVKR                                             |
|                                     | HSAILASPNPDEK                                          |
|                                     | HSEIKLENSIR                                            |
|                                     | KHSAILASPNPDEK                                         |
|                                     | TKEELEELMSDIK + Oxidation (M)                          |
|                                     | GFIDKIAENVEEVK                                         |
|                                     | SIEQSIEQEEGLNR                                         |
|                                     | TKEELEELMSDIK                                          |
|                                     | TKEELEELMSDIK + Oxidation (M)                          |
|                                     | FMDEFFEQVEEIR + Oxidation (M)                          |
|                                     | IEYNVEHAVDYVER                                         |
|                                     | GFIDKIAENVEEVKR                                        |
|                                     | FVEVMSEYNATQSDYR + Oxidation (M)                       |
|                                     | KFVEVMSEYNATQSDYR                                      |
|                                     | KFVEVMSEYNATQSDYR + Oxidation (M)                      |
|                                     | FVEVMSEYNATQSDYRER + Oxidation (M)                     |
| KFVEVMSEYNATQSDYRER + Oxidation (M) |                                                        |
| Syntaxin2                           | QLEITGR                                                |
|                                     | QALNEIESR                                              |
|                                     | IAQHVEDVKK                                             |
|                                     | NVVNSVDYVEHAKETK                                       |
|                                     | NVVNSVDYVEHAKETKK                                      |
|                                     |                                                        |
| Syntaxin3                           | KFVEVMTK + Oxidation (M)                               |
|                                     | QALSEIEGR                                              |
|                                     | HIEEDEVR                                               |
|                                     | YNEAQVDFR                                              |
|                                     | YNEAQVDFRER                                            |
|                                     | SMEKHIEEDEVR + Oxidation (M)                           |
|                                     | TKDDLEQLTTEIK                                          |
|                                     | LYSIILSAPIPEPK                                         |
|                                     | TKDDLEQLTTEIKK                                         |
|                                     | KLYSIILSAPIPEPK                                        |
| Syntaxin4                           | IALENQK                                                |
|                                     | EEIKQLGR                                               |
|                                     | QALNEISAR                                              |
|                                     | VALVVHSGAAR                                            |
|                                     | HSEIQQLER                                              |
|                                     | NILSSADYVER                                            |
|                                     | LSSPDDEFFQK                                            |
|                                     | QGLQNLREEIK                                            |
|                                     | EEADENYNSVNTR                                          |
|                                     | QQVTILATPLPEESMK + Oxidation (M)                       |
|                                     | LSSPDDEFFQKVQTIR                                       |
|                                     | NILSSADYVERGQEHVK                                      |
|                                     | AIEPQKEEADENYNSVNTR                                    |
|                                     | ELEKQQVTILATPLPEESMK + Oxidation (M)                   |
